# Supplementary material
Source: ML conference proceedings conference paper supplement (https://openaccess.thecvf.com/content/cvpr_2016/html/Minh_Approximate_Log-Hilbert-Schmidt_Distances_2016_CVPR_paper.html)
Supplement: Supplementary file 1 [file Minh_Approximate_Log-Hilbert-Schmidt_Distances_2016_CVPR_supplemental.pdf]

# Approximate Log-Hilbert-Schmidt Distances between Covariance Operators for Image Classification Supplementary Material

Hà Quang Minh<sup>1</sup>   Marco San Biagio<sup>1</sup>   Loris Bazzani<sup>2</sup>   Vittorio Murino<sup>1</sup>

<sup>1</sup> Pattern Analysis and Computer Vision (PAVIS), Istituto Italiano di Tecnologia (IIT), Italy

<sup>2</sup> Department of Computer Science, Dartmouth College, USA

{minh.haquang, marco.sanbiagio, vittorio.murino}@iit.it, loris.bazzani@gmail.com

## Abstract

*The Supplementary Material contains the proofs for all mathematical results stated in the main paper. We also describe in more detail the Quasi-random Fourier feature map approach in Section 3.1 of the main paper.*

### 1. Proofs for main mathematical results

For clarity, we restate all the mathematical results that we wish to prove here.

**Theorem 1.** *Assume that  $\gamma \neq \mu$ ,  $\gamma > 0$ ,  $\mu > 0$ . Then*

$$\lim_{D \rightarrow \infty} \left\| \log(C_{\hat{\Phi}_D(\mathbf{x})} + \gamma I_D) - \log(C_{\hat{\Phi}_D(\mathbf{y})} + \mu I_D) \right\|_F = \infty. \quad (1)$$

**Theorem 2.** *Assume that  $\gamma = \mu > 0$  and that  $\lim_{D \rightarrow \infty} \hat{K}_D(x, y) = K(x, y)$  for every pair  $(x, y) \in \mathcal{X} \times \mathcal{X}$ . Then*

$$\lim_{D \rightarrow \infty} \left\| \log(C_{\hat{\Phi}_D(\mathbf{x})} + \gamma I_D) - \log(C_{\hat{\Phi}_D(\mathbf{y})} + \gamma I_D) \right\|_F = \left\| \log(C_{\Phi(\mathbf{x})} + \gamma I_{\mathcal{H}}) - \log(C_{\Phi(\mathbf{y})} + \gamma I_{\mathcal{H}}) \right\|_{\text{eHS}}. \quad (2)$$

We need the following preliminary results. Let  $\mathcal{H}$  be a separable Hilbert space, equipped with norm  $\| \cdot \|$ , and  $A : \mathcal{H} \rightarrow \mathcal{H}$  be a bounded linear operator. We recall that the operator norm of  $A$  is defined to be

$$\|A\| = \sup_{x \neq 0} \frac{\|Ax\|}{\|x\|}. \quad (3)$$

If  $A$  is self-adjoint, compact, and positive, then

$$\|A\| = \lambda_{\max}(A), \quad (4)$$

where  $\lambda_{\max}(A)$  denotes the largest eigenvalue of  $A$ . The trace norm of  $A$  in this case is given by

$$\|A\|_{\text{tr}} = \sum_{k=1}^{\infty} \lambda_k(A) = \text{tr}(A). \quad (5)$$

**Lemma 1.** *Let  $\mathcal{H}$  be a separable Hilbert space. Let  $r \in \mathbb{N}$  be fixed. Let  $A \in \mathcal{L}(\mathcal{H})$  be a self-adjoint, positive operator with finite rank  $r < \infty$ . Then*

$$\|A\| \leq \|A\|_{\text{HS}} \leq \sqrt{r} \|A\|, \quad (6)$$

$$\|A\| \leq \|A\|_{\text{tr}} \leq r \|A\|. \quad (7)$$

*Thus convergences in the  $\| \cdot \|_{\text{HS}}$  norm, the  $\| \cdot \|_{\text{tr}}$  norm, and the  $\| \cdot \|$  norm are all equivalent to each other.*

*Proof.* By definition of the  $\|\cdot\|$  and  $\|\cdot\|_{\text{HS}}$  norms and the finite rank assumption, we have

$$\|A\|^2 = \lambda_{\max}^2(A) \leq \sum_{j=1}^r \lambda_j^2(A) = \|A\|_{\text{HS}}^2 \leq r \lambda_{\max}^2(A),$$

from which the first inequality follows. Similarly, for the second inequality, we have

$$\|A\| = \lambda_{\max}(A) \leq \sum_{j=1}^r \lambda_j(A) = \|A\|_{\text{tr}} \leq r \lambda_{\max}(A) = r \|A\|.$$

This completes the proof of the lemma.  $\square$

**Lemma 2.** *Let  $\mathcal{H}$  be a separable Hilbert space. Let  $r \in \mathbb{N}$  be fixed. Let  $A, \{A_k\}_{k \in \mathbb{N}}$  be self-adjoint, positive operators of rank at most  $r$ , such that  $\lim_{k \rightarrow \infty} \|A_k - A\|_{\text{HS}} = 0$ . Then*

$$\lim_{k \rightarrow \infty} \|\log(I + A_k) - \log(I + A)\|_{\text{HS}} = 0. \quad (8)$$

*Proof.* By assumption, the operators in the sequence  $(A_k - A)_{k \in \mathbb{N}}$  all have rank at most  $2r$ . Thus from Lemma 1, the convergence  $\|A_k - A\|_{\text{HS}}$  is equivalent to the convergence  $\|A_k - A\|$ .

The operators in the sequence  $(\log(I + A_k))_{k \in \mathbb{N}}$  are also self-adjoint, positive, and of rank at most  $r$ . The operators in the sequence  $(\log(I + A_k) - \log(I + A))_{k \in \mathbb{N}}$  have rank at most  $2r$  and thus the convergence  $\|\log(I + A_k) - \log(I + A)\|_{\text{HS}}$  is equivalent to the convergence  $\|\log(I + A_k) - \log(I + A)\|$ . Thus we have

$$\|A_k - A\|_{\text{HS}} \rightarrow 0 \iff \|A_k - A\| \rightarrow 0 \iff \lambda_{\max}(A_k) \rightarrow \lambda_{\max}(A).$$

It follows that

$$\begin{aligned} \log(1 + \lambda_{\max}(A_k)) \rightarrow \log(1 + \lambda_{\max}(A)) &\iff \|\log(I + A_k) - \log(I + A)\| \rightarrow 0 \\ &\iff \|\log(I + A_k) - \log(I + A)\|_{\text{HS}} \rightarrow 0. \end{aligned}$$

This completes the proof of the lemma.  $\square$

**Lemma 3.** *Let  $\mathcal{H}$  be a separable Hilbert space. Let  $r \in \mathbb{N}$  be fixed. Let  $A, \{A_k\}_{k \in \mathbb{N}}$  be self-adjoint, positive operators of rank at most  $r$ , such that  $\lim_{k \rightarrow \infty} \|A_k - A\|_{\text{HS}} = 0$ . Then*

$$\lim_{k \rightarrow \infty} \text{tr}[\log(I + A_k) - \log(I + A)] = 0. \quad (9)$$

*Proof.* By assumption, the operators in the sequence  $(\log(I + A_k))_{k \in \mathbb{N}}$  are also self-adjoint, positive, and of rank at most  $r$ . The operators in the sequence  $(\log(I + A_k) - \log(I + A))_{k \in \mathbb{N}}$  have rank at most  $2r$  and by Lemma 2,  $\lim_{k \rightarrow \infty} \|\log(I + A_k) - \log(I + A)\|_{\text{HS}} = 0$ . By Lemma 1, this convergence is equivalent to convergence in the  $\|\cdot\|_{\text{tr}}$  norm. Thus we have

$$|\text{tr}[\log(I + A_k) - \log(I + A)]| \leq \|\log(I + A_k) - \log(I + A)\|_{\text{tr}} \rightarrow 0$$

as  $k \rightarrow \infty$ . This completes the proof of the lemma.  $\square$

**Lemma 4.** *Let  $\mathcal{H}$  be a separable Hilbert space. Let  $r \in \mathbb{N}$  be fixed. Let  $A, \{A_k\}_{k \in \mathbb{N}}, B, \{B_k\}_{k \in \mathbb{N}}$  be self-adjoint, positive operators of rank at most  $r$ , such that  $\lim_{k \rightarrow \infty} \|A_k - A\|_{\text{HS}} = 0$  and  $\lim_{k \rightarrow \infty} \|B_k - B\|_{\text{HS}} = 0$ . Then*

$$\lim_{k \rightarrow \infty} \text{tr}[\log(I + A_k) \log(I + B_k)] = \text{tr}[\log(I + A) \log(I + B)]. \quad (10)$$

*Proof.* From Lemma 2, we have

$$\begin{aligned} \lim_{k \rightarrow \infty} \|\log(I + A_k) - \log(I + A)\|_{\text{HS}} &= 0, \\ \lim_{k \rightarrow \infty} \|\log(I + B_k) - \log(I + B)\|_{\text{HS}} &= 0. \end{aligned}$$

Thus, using Cauchy-Schwarz inequality and the definition  $\langle A, B \rangle_{\text{HS}} = \text{tr}(A^T B)$ , we obtain

$$\begin{aligned}
& |\text{tr}[\log(I + A_k) \log(I + B_k) - \log(I + A) \log(I + B)]| \\
&= |\text{tr}[\log(I + A_k) \log(I + B_k) - \log(I + A_k) \log(I + B) + \log(I + A_k) \log(I + B) - \log(I + A) \log(I + B)]| \\
&= |\text{tr}[\log(I + A_k)(\log(I + B_k) - \log(I + B)) + (\log(I + A_k) - \log(I + A)) \log(I + B)]| \\
&= |\langle \log(I + A_k), \log(I + B_k) - \log(I + B) \rangle_{\text{HS}} + \langle \log(I + A_k) - \log(I + A), \log(I + B) \rangle_{\text{HS}}| \\
&\leq |\langle \log(I + A_k), \log(I + B_k) - \log(I + B) \rangle_{\text{HS}}| + |\langle \log(I + A_k) - \log(I + A), \log(I + B) \rangle_{\text{HS}}| \\
&\leq \|\log(I + A_k)\|_{\text{HS}} \|\log(I + B_k) - \log(I + B)\|_{\text{HS}} + \|\log(I + A_k) - \log(I + A)\|_{\text{HS}} \|\log(I + B)\|_{\text{HS}}.
\end{aligned}$$

Taking limit on both sides as  $k \rightarrow \infty$ , we obtain

$$\lim_{k \rightarrow \infty} \text{tr}[\log(I + A_k) \log(I + B_k) - \log(I + A) \log(I + B)] = 0.$$

This completes the proof of the lemma.  $\square$

**Lemma 5.** [2] Let  $\mathcal{H}_1$  and  $\mathcal{H}_2$  be two separable Hilbert spaces. Let  $A : \mathcal{H}_1 \rightarrow \mathcal{H}_2$  and  $B : \mathcal{H}_2 \rightarrow \mathcal{H}_1$  be two bounded linear operators. Then the nonzero eigenvalues of  $BA : \mathcal{H}_1 \rightarrow \mathcal{H}_1$  and  $AB : \mathcal{H}_2 \rightarrow \mathcal{H}_2$ , if they exist, are the same.

In the following, we identify  $\mathcal{H}$  with  $\ell^2$  and  $\mathbb{R}^D$  with a  $D$ -dimensional subspace of  $\ell^2$ , that is

$$a = (a_j)_{j=1}^D \in \mathbb{R}^D \iff a = (a_1, \dots, a_D, 0, 0, \dots) \in \ell^2. \quad (11)$$

For the data matrices  $\mathbf{x} = [x_1, \dots, x_m]$ ,  $\mathbf{y} = [y_1, \dots, y_m]$ , let  $K[\mathbf{x}]$ ,  $K[\mathbf{y}]$ ,  $\hat{K}_D[\mathbf{x}]$ ,  $\hat{K}_D[\mathbf{y}]$  be the  $m \times m$  Gram matrices, defined by

$$(K[\mathbf{x}])_{ij} = K(x_i, x_j), \quad (\hat{K}_D[\mathbf{x}])_{ij} = \hat{K}_D(x_i, x_j), \quad (K[\mathbf{y}])_{ij} = K(y_i, y_j), \quad (\hat{K}_D[\mathbf{y}])_{ij} = \hat{K}_D(y_i, y_j).$$

**Lemma 6.** Let  $\mathcal{H} = \ell^2$ , with  $\mathbb{R}^D$  identified with a  $D$ -dimensional subspace of  $\mathcal{H}$  as in Eq. (11). Assume that  $\lim_{D \rightarrow \infty} \hat{K}_D(x, y) = K(x, y)$  for all pairs  $(x, y) \in \mathcal{X} \times \mathcal{X}$ . Then

$$\lim_{D \rightarrow \infty} \|C_{\hat{\Phi}_D(\mathbf{x})} - C_{\Phi(\mathbf{x})}\|_{\text{HS}(\mathcal{H})} = 0. \quad (12)$$

*Proof.* Let  $A = \frac{1}{\sqrt{m}} \Phi(\mathbf{x}) J_m : \mathbb{R}^m \rightarrow \mathcal{H}$ , then

$$AA^T = C_{\Phi(\mathbf{x})}, \quad A^T A = \frac{1}{m} J_m K[\mathbf{x}] J_m.$$

By Lemma 5, the nonzero eigenvalues of  $C_{\Phi(\mathbf{x})} = AA^T$  are the same as those of  $\frac{1}{m} J_m K[\mathbf{x}] J_m = A^T A$ . Similarly, the nonzero eigenvalues of  $C_{\hat{\Phi}_D(\mathbf{x})}$  are the same as those of  $\frac{1}{m} J_m \hat{K}_D[\mathbf{x}] J_m$ . This also implies that both  $C_{\Phi(\mathbf{x})}$  and  $C_{\hat{\Phi}_D(\mathbf{x})}$  have rank at most  $m - 1$ , since  $\text{rank}(J_m) = m - 1$ .

Since  $\lim_{D \rightarrow \infty} \hat{K}_D(x_i, x_j) = K(x_i, x_j)$  for all pairs  $(x_i, x_j)$ ,  $1 \leq i, j \leq m$ , we have, as  $m \times m$  matrices,

$$\lim_{D \rightarrow \infty} \|J_m \hat{K}_D[\mathbf{x}] J_m - J_m K[\mathbf{x}] J_m\|_F = 0.$$

Since  $J_m \hat{K}_D[\mathbf{x}] J_m$  and  $J_m K[\mathbf{x}] J_m$  are finite matrices, convergence in the  $\|\cdot\|_F$  norm is equivalent to convergence in the operator  $\|\cdot\|$  norm. Thus we have

$$\begin{aligned}
\lim_{D \rightarrow \infty} \|J_m \hat{K}_D[\mathbf{x}] J_m - J_m K[\mathbf{x}] J_m\| &= 0 \iff \lim_{D \rightarrow \infty} \lambda_{\max}(J_m \hat{K}_D[\mathbf{x}] J_m) = \lambda_{\max}(J_m K[\mathbf{x}] J_m) \\
&\iff \lim_{D \rightarrow \infty} \lambda_{\max}(C_{\hat{\Phi}_D(\mathbf{x})}) = \lambda_{\max}(C_{\Phi(\mathbf{x})}) \iff \lim_{D \rightarrow \infty} \|C_{\hat{\Phi}_D(\mathbf{x})} - C_{\Phi(\mathbf{x})}\| = 0 \\
&\iff \lim_{D \rightarrow \infty} \|C_{\hat{\Phi}_D(\mathbf{x})} - C_{\Phi(\mathbf{x})}\|_{\text{HS}(\mathcal{H})} = 0,
\end{aligned}$$

by Lemma 1, since both  $C_{\hat{\Phi}_D(\mathbf{x})}$ ,  $C_{\Phi(\mathbf{x})}$  have rank at most  $m - 1$ . This completes the proof of the lemma.  $\square$

**Proof of Theorem 1.** Consider the expansion

$$\begin{aligned} & \left\| \log \left( C_{\hat{\Phi}_D(\mathbf{x})} + \gamma I_D \right) - \log \left( C_{\hat{\Phi}_D(\mathbf{y})} + \mu I_D \right) \right\|_F^2 = \left\| \log \left( \frac{C_{\hat{\Phi}_D(\mathbf{x})}}{\gamma} + I_D \right) - \log \left( \frac{C_{\hat{\Phi}_D(\mathbf{y})}}{\mu} + I_D \right) + (\log \gamma - \log \mu) I_D \right\|_F^2 \\ & = \left\| \log \left( \frac{C_{\hat{\Phi}_D(\mathbf{x})}}{\gamma} + I_D \right) - \log \left( \frac{C_{\hat{\Phi}_D(\mathbf{y})}}{\mu} + I_D \right) \right\|_F^2 + 2(\log \gamma - \log \mu) \text{tr} \left( \log \left( \frac{C_{\hat{\Phi}_D(\mathbf{x})}}{\gamma} + I_D \right) - \log \left( \frac{C_{\hat{\Phi}_D(\mathbf{y})}}{\mu} + I_D \right) \right) \\ & \quad + (\log \gamma - \log \mu)^2 D. \end{aligned} \quad (13)$$

With  $\mathbb{R}^D$  identified as a subspace of  $\mathcal{H} = \ell^2$ , we have by Lemma 6 (with the scaling factors  $\gamma, \mu$ ), that

$$\lim_{D \rightarrow \infty} \left\| \frac{C_{\hat{\Phi}_D(\mathbf{x})}}{\gamma} - \frac{C_{\Phi(\mathbf{x})}}{\gamma} \right\|_{\text{HS}(\mathcal{H})}^2 = 0, \quad \lim_{D \rightarrow \infty} \left\| \frac{C_{\hat{\Phi}_D(\mathbf{y})}}{\mu} - \frac{C_{\Phi(\mathbf{y})}}{\mu} \right\|_{\text{HS}(\mathcal{H})}^2 = 0.$$

By Lemma 3, we have

$$\begin{aligned} \lim_{D \rightarrow \infty} \text{tr} \left( \log \left( \frac{C_{\hat{\Phi}_D(\mathbf{x})}}{\gamma} + I_D \right) \right) &= \text{tr} \left( \log \left( \frac{C_{\Phi(\mathbf{x})}}{\gamma} + I_{\mathcal{H}} \right) \right) = \text{tr} \left[ \log \left( \frac{1}{\gamma m} J_m K[\mathbf{x}] J_m + I_m \right) \right], \\ \lim_{D \rightarrow \infty} \text{tr} \left( \log \left( \frac{C_{\hat{\Phi}_D(\mathbf{y})}}{\mu} + I_D \right) \right) &= \text{tr} \left( \log \left( \frac{C_{\Phi(\mathbf{y})}}{\mu} + I_{\mathcal{H}} \right) \right) = \text{tr} \left[ \log \left( \frac{1}{\mu m} J_m K[\mathbf{y}] J_m + I_m \right) \right]. \end{aligned}$$

Since these two quantities are both finite, for  $\gamma \neq \mu$ , as  $D \rightarrow \infty$ , clearly the right hand side of Eq. (13) goes to infinity. This gives us the desired limit.  $\square$

**Proof of Theorem 2.** Without loss of generality, we identify  $\mathcal{H}$  with  $\ell^2$  as above and identify  $\mathbb{R}^D$  with a  $D$ -dimensional subspace of  $\ell^2$  as in Eq. (11). When  $\gamma = \mu$ , we have

$$\begin{aligned} & \left\| \log(C_{\Phi(\mathbf{x})} + \gamma I_{\mathcal{H}}) - \log(C_{\Phi(\mathbf{y})} + \gamma I_{\mathcal{H}}) \right\|_{\text{eHS}}^2 = \left\| \log \left( \frac{C_{\Phi(\mathbf{x})}}{\gamma} + I_{\mathcal{H}} \right) - \log \left( \frac{C_{\Phi(\mathbf{y})}}{\gamma} + I_{\mathcal{H}} \right) \right\|_{\text{HS}}^2 \\ & = \left\| \log \left( \frac{C_{\Phi(\mathbf{x})}}{\gamma} + I_{\mathcal{H}} \right) \right\|_{\text{HS}}^2 + \left\| \log \left( \frac{C_{\Phi(\mathbf{y})}}{\gamma} + I_{\mathcal{H}} \right) \right\|_{\text{HS}}^2 - 2 \text{tr} \left[ \log \left( \frac{C_{\Phi(\mathbf{x})}}{\gamma} + I_{\mathcal{H}} \right) \log \left( \frac{C_{\Phi(\mathbf{y})}}{\gamma} + I_{\mathcal{H}} \right) \right]. \end{aligned}$$

It follows from Lemma 5 that the first term is

$$\begin{aligned} \left\| \log \left( \frac{1}{\gamma} C_{\Phi(\mathbf{x})} + I_{\mathcal{H}} \right) \right\|_{\text{HS}}^2 &= \left\| \log \left( \frac{1}{\gamma m} \Phi(\mathbf{x}) J_m^2 \Phi(\mathbf{x})^T + I_{\mathcal{H}} \right) \right\|_{\text{HS}}^2 = \left\| \log \left( \frac{1}{\gamma m} J_m \Phi(\mathbf{x})^T \Phi(\mathbf{x}) J_m + I_m \right) \right\|_{\text{HS}}^2 \\ &= \left\| \log \left( \frac{1}{\gamma m} J_m K[\mathbf{x}] J_m + I_m \right) \right\|_{\text{HS}}^2 = \text{tr} \left[ \log \left( \frac{1}{\gamma m} J_m K[\mathbf{x}] J_m + I_m \right) \right]^2. \end{aligned}$$

Similarly, the second term is

$$\left\| \log \left( \frac{1}{\gamma} C_{\Phi(\mathbf{y})} + I_{\mathcal{H}} \right) \right\|_{\text{HS}}^2 = \text{tr} \left[ \log \left( \frac{1}{\gamma m} J_m K[\mathbf{y}] J_m + I_m \right) \right]^2.$$

Thus we have

$$\begin{aligned} \left\| \log(C_{\Phi(\mathbf{x})} + \gamma I_{\mathcal{H}}) - \log(C_{\Phi(\mathbf{y})} + \gamma I_{\mathcal{H}}) \right\|_{\text{eHS}}^2 &= \text{tr} \left[ \log \left( \frac{1}{\gamma m} J_m K[\mathbf{x}] J_m + I_m \right) \right]^2 + \text{tr} \left[ \log \left( \frac{1}{\gamma m} J_m K[\mathbf{y}] J_m + I_m \right) \right]^2 \\ &\quad - 2 \text{tr} \left[ \log \left( \frac{C_{\Phi(\mathbf{x})}}{\gamma} + I_{\mathcal{H}} \right) \log \left( \frac{C_{\Phi(\mathbf{y})}}{\gamma} + I_{\mathcal{H}} \right) \right]. \end{aligned} \quad (14)$$

Similarly,

$$\begin{aligned} \left\| \log(C_{\hat{\Phi}_D(\mathbf{x})} + \gamma I_D) - \log(C_{\hat{\Phi}_D(\mathbf{y})} + \gamma I_D) \right\|_F^2 &= \text{tr} \left[ \log \left( \frac{1}{\gamma m} J_m \hat{K}_D[\mathbf{x}] J_m + I_m \right) \right]^2 + \text{tr} \left[ \log \left( \frac{1}{\gamma m} J_m \hat{K}_D[\mathbf{y}] J_m + I_m \right) \right]^2 \\ &\quad - 2 \text{tr} \left[ \log \left( \frac{C_{\hat{\Phi}_D(\mathbf{x})}}{\gamma} + I_D \right) \log \left( \frac{C_{\hat{\Phi}_D(\mathbf{y})}}{\gamma} + I_D \right) \right]. \end{aligned} \quad (15)$$

With  $\mathbb{R}^D$  identified as a subspace of  $\mathcal{H} = \ell^2$ , we have by Lemma 6 (with the scaling factor  $\gamma$ ), that

$$\lim_{D \rightarrow \infty} \left\| \frac{C_{\hat{\Phi}_D(\mathbf{x})}}{\gamma} - \frac{C_{\Phi(\mathbf{x})}}{\gamma} \right\|_{\text{HS}(\mathcal{H})}^2 = 0, \quad \lim_{D \rightarrow \infty} \left\| \frac{C_{\hat{\Phi}_D(\mathbf{y})}}{\gamma} - \frac{C_{\Phi(\mathbf{y})}}{\gamma} \right\|_{\text{HS}(\mathcal{H})}^2 = 0,$$

with the operators  $C_{\hat{\Phi}_D(\mathbf{x})}, C_{\Phi(\mathbf{x})}, C_{\hat{\Phi}_D(\mathbf{y})}, C_{\Phi(\mathbf{y})}$  all have rank at most  $m - 1$ . It thus follows from Lemma 4 that

$$\lim_{D \rightarrow \infty} \text{tr} \left[ \log \left( \frac{C_{\hat{\Phi}_D(\mathbf{x})}}{\gamma} + I_D \right) \log \left( \frac{C_{\hat{\Phi}_D(\mathbf{y})}}{\gamma} + I_D \right) \right] = \text{tr} \left[ \log \left( \frac{C_{\Phi(\mathbf{x})}}{\gamma} + I_{\mathcal{H}} \right) \log \left( \frac{C_{\Phi(\mathbf{y})}}{\gamma} + I_{\mathcal{H}} \right) \right]. \quad (16)$$

Similarly, since  $\lim_{D \rightarrow \infty} \hat{K}_D(x_i, x_j) = K(x_i, x_j)$  for all pairs  $(x_i, x_j)$  and  $\lim_{D \rightarrow \infty} \hat{K}_D(y_i, y_j) = K(y_i, y_j)$  for all pairs  $(y_i, y_j)$ ,  $1 \leq i, j \leq m$ , we have, as  $m \times m$  matrices,

$$\lim_{D \rightarrow \infty} \|J_m \hat{K}_D[\mathbf{x}] J_m - J_m K[\mathbf{x}] J_m\|_F = 0, \quad \lim_{D \rightarrow \infty} \|J_m \hat{K}_D[\mathbf{y}] J_m - J_m K[\mathbf{y}] J_m\|_F = 0.$$

It also follows from Lemma 4 that

$$\lim_{D \rightarrow \infty} \text{tr} \left[ \log \left( \frac{1}{\gamma m} J_m \hat{K}_D[\mathbf{x}] J_m + I_m \right) \right]^2 = \text{tr} \left[ \log \left( \frac{1}{\gamma m} J_m K[\mathbf{x}] J_m + I_m \right) \right]^2, \quad (17)$$

$$\lim_{D \rightarrow \infty} \text{tr} \left[ \log \left( \frac{1}{\gamma m} J_m \hat{K}_D[\mathbf{y}] J_m + I_m \right) \right]^2 = \text{tr} \left[ \log \left( \frac{1}{\gamma m} J_m K[\mathbf{y}] J_m + I_m \right) \right]^2. \quad (18)$$

Combining the expressions in Eqs. (14), (15), (16), (17), (18), we obtain

$$\lim_{D \rightarrow \infty} \|\log(C_{\hat{\Phi}_D(\mathbf{x})} + \gamma I_D) - \log(C_{\hat{\Phi}_D(\mathbf{y})} + \gamma I_D)\|_F^2 = \|\log(C_{\Phi(\mathbf{x})} + \gamma I_{\mathcal{H}}) - \log(C_{\Phi(\mathbf{y})} + \gamma I_{\mathcal{H}})\|_{\text{eHS}}^2.$$

This completes the proof of the Theorem.  $\square$

## 2. Further information on the Hilbert-Schmidt distance between covariance operators

For completeness, in this section we provide the mathematical expression for the Hilbert-Schmidt distance between two RKHS covariance operators. This was used for carrying out the corresponding experiments on the Fish dataset in the main paper. Let  $K$  be a positive definite kernel on an arbitrary non-empty set  $\mathcal{X}$  and  $\mathcal{H}_K$  be its corresponding RKHS. Let  $C_{\Phi(\mathbf{x})}$  and  $C_{\Phi(\mathbf{y})}$  be the covariance operators corresponding to two  $n \times m$  data matrices  $\mathbf{x}$  and  $\mathbf{y}$ , respectively, sampled from  $\mathcal{X}$ . Following [2], let  $K[\mathbf{x}]$ ,  $K[\mathbf{y}]$ , and  $K[\mathbf{x}, \mathbf{y}]$  denote the  $m \times m$  Gram matrices defined by

$$(K[\mathbf{x}])_{ij} = K(x_i, x_j), \quad (K[\mathbf{y}])_{ij} = K(y_i, y_j), \quad (K[\mathbf{x}, \mathbf{y}])_{ij} = K(x_i, y_j), \quad 1 \leq i, j \leq m.$$

Then the Gram matrices and the covariance operators are related by

$$\Phi(\mathbf{x})^T \Phi(\mathbf{x}) = K[\mathbf{x}], \quad \Phi(\mathbf{y})^T \Phi(\mathbf{y}) = K[\mathbf{y}], \quad \Phi(\mathbf{x})^T \Phi(\mathbf{y}) = K[\mathbf{x}, \mathbf{y}].$$

Here  $\Phi(\mathbf{x})^T$  denotes the transpose of  $\Phi(\mathbf{x})$  in the case  $\dim(\mathcal{H}_K) < \infty$  and the adjoint operator of  $\Phi(\mathbf{x})$  in the case  $\dim(\mathcal{H}_K) = \infty$ .

**Lemma 7.** *The Hilbert-Schmidt distances between two RKHS covariance operators  $C_{\Phi(\mathbf{x})}$  and  $C_{\Phi(\mathbf{y})}$  is given by*

$$\|C_{\Phi(\mathbf{x})} - C_{\Phi(\mathbf{y})}\|_{\text{HS}}^2 = \frac{1}{m^2} \langle J_m K[\mathbf{x}], K[\mathbf{x}] J_m \rangle_F - \frac{2}{m^2} \langle J_m K[\mathbf{x}, \mathbf{y}], K[\mathbf{x}, \mathbf{y}] J_m \rangle_F + \frac{1}{m^2} \langle J_m K[\mathbf{y}], K[\mathbf{y}] J_m \rangle_F. \quad (19)$$

**Proof of Lemma 7.** By definition of the Hilbert-Schmidt norm and property of the trace operation, we have

$$\begin{aligned} \|C_{\Phi(\mathbf{x})} - C_{\Phi(\mathbf{y})}\|_{\text{HS}}^2 &= \left\| \frac{1}{m} \Phi(\mathbf{x}) J_m \Phi(\mathbf{x})^T - \frac{1}{m} \Phi(\mathbf{y}) J_m \Phi(\mathbf{y})^T \right\|_{\text{HS}}^2 \\ &= \frac{1}{m^2} \|\Phi(\mathbf{x}) J_m \Phi(\mathbf{x})^T\|_{\text{HS}}^2 - \frac{2}{m^2} \langle \Phi(\mathbf{x}) J_m \Phi(\mathbf{x})^T, \Phi(\mathbf{y}) J_m \Phi(\mathbf{y})^T \rangle_{\text{HS}} + \frac{1}{m^2} \|\Phi(\mathbf{y}) J_m \Phi(\mathbf{y})^T\|_{\text{HS}}^2 \\ &= \frac{1}{m^2} \text{tr}[\Phi(\mathbf{x}) J_m \Phi(\mathbf{x})^T \Phi(\mathbf{x}) J_m \Phi(\mathbf{x})^T] - \frac{2}{m^2} \text{tr}[\Phi(\mathbf{x}) J_m \Phi(\mathbf{x})^T \Phi(\mathbf{y}) J_m \Phi(\mathbf{y})^T] + \frac{1}{m^2} \text{tr}[\Phi(\mathbf{y}) J_m \Phi(\mathbf{y})^T \Phi(\mathbf{y}) J_m \Phi(\mathbf{y})^T] \\ &= \frac{1}{m^2} \text{tr}[(K[\mathbf{x}] J_m)^2 - 2K[\mathbf{y}, \mathbf{x}] J_m K[\mathbf{x}, \mathbf{y}] J_m + (K[\mathbf{y}] J_m)^2] \\ &= \frac{1}{m^2} [\langle J_m K[\mathbf{x}], K[\mathbf{x}] J_m \rangle_F - 2\langle J_m K[\mathbf{x}, \mathbf{y}], K[\mathbf{x}, \mathbf{y}] J_m \rangle_F + \langle J_m K[\mathbf{y}], K[\mathbf{y}] J_m \rangle_F]. \end{aligned}$$

This completes the proof of the lemma.  $\square$

### 3. Further information on the Quasi-random Fourier features

Consider again the expression of the kernel  $K(x, y) = k(x - y)$  by Bochner's theorem

$$\begin{aligned} k(x - y) &= \int_{\mathbb{R}^n} e^{-i\langle \omega, x-y \rangle} d\rho(\omega) \\ &= \int_{\mathbb{R}^n} \rho(\omega) \phi_\omega(x) \overline{\phi_\omega(y)} d\omega, \text{ where } \phi_\omega(x) = e^{-i\langle \omega, x \rangle}. \end{aligned} \quad (20)$$

The Random Fourier feature maps arise from the Monte-Carlo approximation of the integral in Eq. (20), using a *random* set of points  $\omega_j$ 's sampled according to the distribution  $\rho$ . In this section, we describe in more detail the Quasi-random Fourier features approach proposed recently by [4]. This approach is based on the methodology of Quasi-Monte Carlo integration [1], in which the  $\omega_j$ 's are *deterministic* points arising from a *low-discrepancy* sequence in  $[0, 1]^n$  (see below for more details).

Assume that the distribution  $\rho$  in Eq. (20) has the product form  $\rho(\omega) = \prod_{j=1}^n \rho_j(\omega_j)$ . Assume that each component cumulative distribution function  $\psi_j(x_j) = \int_{-\infty}^{x_j} \rho_j(z_j) dz_j$  is strictly increasing, so that the inverse functions  $\psi_j^{-1} : [0, 1] \rightarrow \mathbb{R}$  are all well-defined. Let  $\psi : \mathbb{R}^n \rightarrow [0, 1]^n$  be defined by  $\psi(x) = (\psi_1(x_1), \dots, \psi_n(x_n))$ . Then its inverse function  $\psi^{-1} : [0, 1]^n \rightarrow \mathbb{R}^n$  is well-defined and is given component-wise by  $\psi^{-1}(z) = (\psi^{-1}(z_1), \dots, \psi^{-1}(z_n)) = (\psi_1^{-1}(z_1), \dots, \psi_n^{-1}(z_n))$ .

With the change of variable  $\omega = \psi^{-1}(t)$ , the integral in Eq. (20) becomes

$$\int_{\mathbb{R}^n} e^{-i\langle \omega, x-y \rangle} \rho(\omega) d\omega = \int_{[0,1]^n} e^{-i\langle \psi^{-1}(t), x-y \rangle} dt. \quad (21)$$

Instead of approximating the left hand side of Eq. (21) using a random set of points  $\{\omega_j\}_{j=1}^D$  in  $\mathbb{R}^n$  sampled according to  $\rho$ , in the Quasi-Monte Carlo approach, one approximates the right hand side using a deterministic, low-discrepancy sequence of points  $\{t_j\}_{j=1}^D$  in  $[0, 1]^n$ . This sequence gives rise to a deterministic sequence

$$\omega_j = \psi^{-1}(t_j), \quad 1 \leq j \leq D, \quad (22)$$

from which we construct the Fourier feature map as described by Eqs. (23), (24), and (25),

$$\cos(W^T x) = (\cos(\langle \omega_1, x \rangle), \dots, \cos(\langle \omega_D, x \rangle))^T \in \mathbb{R}^D, \quad (23)$$

$$\sin(W^T x) = (\sin(\langle \omega_1, x \rangle), \dots, \sin(\langle \omega_D, x \rangle))^T \in \mathbb{R}^D. \quad (24)$$

$$\hat{\Phi}_D(x) = \frac{1}{\sqrt{D}} (\cos(W^T x); \sin(W^T x)) \in \mathbb{R}^{2D}, \quad (25)$$

just as in the case of random Fourier features. In our experiments,  $\{t_j\}_{j=1}^D$  is a Halton sequence, whose implementation is readily available in MATLAB<sup>1</sup>.

#### 3.1. Low-discrepancy sequences

In this section, we briefly review the concept of *low-discrepancy sequences* in Quasi-Monte Carlo methods. For a comprehensive treatment, we refer to [3]. Let  $n \in \mathbb{N}$  be fixed. Let  $I^n = [0, 1]^n$  and denote its closure by  $\bar{I}^n = [0, 1]^n$ . For an integrable function  $f$  in  $\bar{I}^n$ , we consider the approximation

$$\int_{\bar{I}^n} f(u) du \approx \frac{1}{N} \sum_{j=1}^N f(x_j) \quad (26)$$

using a deterministic set of points  $P = (x_1, \dots, x_N)$ , which are part of an infinite sequence  $(x_j)_{j \in \mathbb{N}}$  in  $\bar{I}^n$ , such that the integration error satisfies

$$\lim_{N \rightarrow \infty} \left| \frac{1}{N} \sum_{j=1}^N f(x_j) - \int_{\bar{I}^n} f(u) du \right| = 0. \quad (27)$$

<sup>1</sup><http://www.mathworks.com/help/stats/quasi-random-numbers.html>

This convergence can be measured via the concept of *discrepancy* as follows. Let  $N$  be fixed. For an arbitrary set  $B \subset \bar{I}^n$ , define the counting function

$$A(B; P) = \sum_{j=1}^N \chi_B(x_j), \quad (28)$$

where  $\chi_B$  denotes the characteristic function for  $B$ . Thus  $A(B; P)$  denotes the number of points in  $P$  that lie in the set  $B$ .

Let  $\mathcal{B}$  be a non-empty family of Lebesgue-measurable subsets of  $\bar{I}^n$ . The discrepancy of the set  $P$  with respect to  $\mathcal{B}$  is then defined by

$$D_N(\mathcal{B}; P) = \sup_{B \in \mathcal{B}} \left| \frac{A(B; P)}{N} - \text{vol}(B) \right|, \quad (29)$$

with  $\text{vol}(B)$  denoting the volume of  $B$  with respect to the Lebesgue measure.

The *star discrepancy*  $D_N^*(P)$  is defined by

$$D_N^*(P) = D_N(\mathcal{J}^*; P), \quad (30)$$

where  $\mathcal{J}^*$  denotes the family of all subintervals of  $I^n$  of the form  $\prod_{j=1}^n [0, x_j]$ . The star discrepancy and the integration error are related via the Koksma-Hlawka inequality, as follows. Define

$$V(f) = \sum_{k=1}^n \sum_{1 \leq i_1 \leq \dots \leq i_k \leq n} \int_0^1 \dots \int_0^1 \left| \frac{\partial^k f}{\partial u_{i_1} \dots \partial u_{i_k}} \right| du_{i_1} \dots du_{i_k}, \quad (31)$$

which is called the *variation of  $f$  on  $\bar{I}^n$  in the sense of Hardy-Krause*.

**Theorem 3 (Koksma-Hlawka inequality).** *If  $f$  has bounded variation  $V(f)$  on  $\bar{I}^n$  in the sense of Hardy-Krause, then for any set  $(x_1, \dots, x_N)$  in  $I^n$ ,*

$$\left| \frac{1}{N} \sum_{j=1}^N f(x_j) - \int_{\bar{I}^n} f(u) du \right| \leq V(f) D_N^*(x_1, \dots, x_N). \quad (32)$$

By Theorem 3, to achieve a small integration error, we need a sequence  $(x_j)_{j \in \mathbb{N}}$  with *low discrepancy*  $D_N^*(x_1, \dots, x_N) \rightarrow 0$  as  $N \rightarrow \infty$ . Some examples of low-discrepancy sequences are Halton and Sobol' sequences (we refer to [3, 1] for the detailed constructions of these and other sequences). The Halton sequence in particular satisfies  $D_N^*(x_1, \dots, x_N) = C(n) \frac{(\log N)^n}{N}$  for  $N \geq 2$ .

### 3.2. The Gaussian case

In this section, we give the explicit expression for the functions  $\psi$  and  $\psi^{-1}$ , as defined above, in the case of the Gaussian kernel. It suffices for us to consider the one-dimensional setting here, since the multivariate case is defined componentwise using the one-dimensional case. For  $K(x, y) = e^{-\frac{(x-y)^2}{\sigma^2}}$ , we have  $\rho(z) = \frac{\sigma}{2\sqrt{\pi}} e^{-\frac{\sigma^2 z^2}{4}}$ . Recall the Gaussian error function  $\text{erf}$  defined by  $\text{erf}(x) = \frac{2}{\sqrt{\pi}} \int_0^x e^{-z^2} dz$  and the complementary Gaussian error function  $\text{erfc}$  defined by  $\text{erfc}(x) = \frac{2}{\sqrt{\pi}} \int_x^\infty e^{-z^2} dz = 1 - \text{erf}(x)$ . By definition, the cumulative distribution function  $\psi$  for  $\rho$  is given by

$$\psi(x) = \int_{-\infty}^x \rho(z) dz = 1 - \int_x^\infty \rho(z) dz = 1 - \frac{\sigma}{2\sqrt{\pi}} \int_x^\infty e^{-\frac{\sigma^2 z^2}{4}} dz = 1 - \frac{1}{\sqrt{\pi}} \int_{\frac{x\sigma}{2}}^\infty e^{-u^2} du = 1 - \frac{1}{2} \text{erfc}\left(\frac{x\sigma}{2}\right).$$

It follows that the inverse function  $\psi^{-1}$  is given by

$$x = \psi^{-1}(t) = \frac{2}{\sigma} \text{erfc}^{-1}(2 - 2t) = \frac{2}{\sigma} \text{erf}^{-1}(2t - 1). \quad (33)$$

## References

- [1] J. Dick, F. Kuo, and I. Sloan. High-dimensional integration: the quasi-Monte Carlo way. *Acta Numerica*, 22:133–288, 2013. [6](#), [7](#)
- [2] H. Minh, M. San Biagio, and V. Murino. Log-Hilbert-Schmidt metric between positive definite operators on Hilbert spaces. In *NIPS*, 2014. [3](#), [5](#)
- [3] H. Niederreiter. *Random number generation and quasi-Monte Carlo methods*. SIAM, 1992. [6](#), [7](#)
- [4] J. Yang, V. Sindhvani, H. Avron, and M. Mahoney. Quasi-Monte Carlo feature maps for shift-invariant kernels. In *ICML*, pages 485–493, 2014. [6](#)
